# Supplementary material
Source: Springer Nature journal article supplement (https://www.springermedizin.de/resource/supplementary/12936_2007_632_MOESM2_ESM.pdf/9547864)

|                 |   |   |   |   |   |   |   |   |   |
|-----------------|---|---|---|---|---|---|---|---|---|
| Latex particles | - | - | - | + | + | + | - | - | - |
| HZ              | - | - | - | - | - | - | + | + | + |
| rhIL-1beta      | - | + | - | - | + | - | - | + | - |
| Anti-hIL-1beta  | - | - | + | - | - | + | - | - | + |

92 kDa -

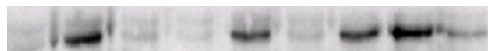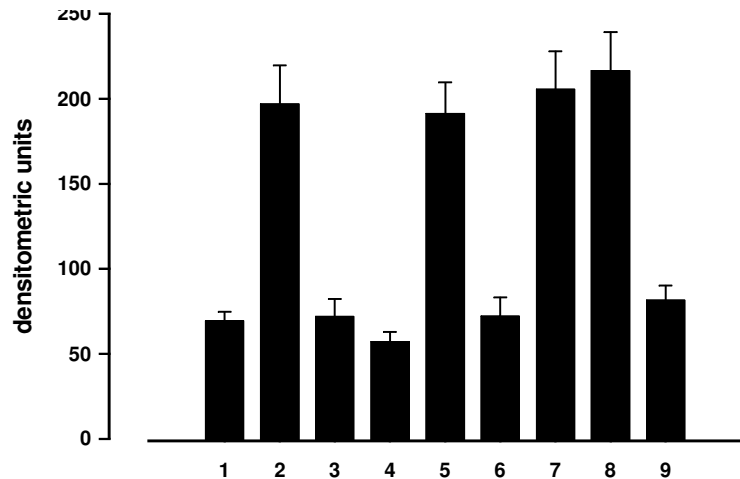

**A**

|                 |   |   |   |   |   |   |   |   |   |
|-----------------|---|---|---|---|---|---|---|---|---|
| Latex particles | - | - | - | + | + | + | - | - | - |
| HZ              | - | - | - | - | - | - | + | + | + |
| rhIL-1beta      | - | + | - | - | + | - | - | + | - |
| Anti-hIL-1beta  | - | - | + | - | - | + | - | - | + |

83 kDa -

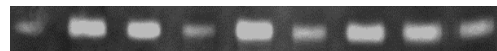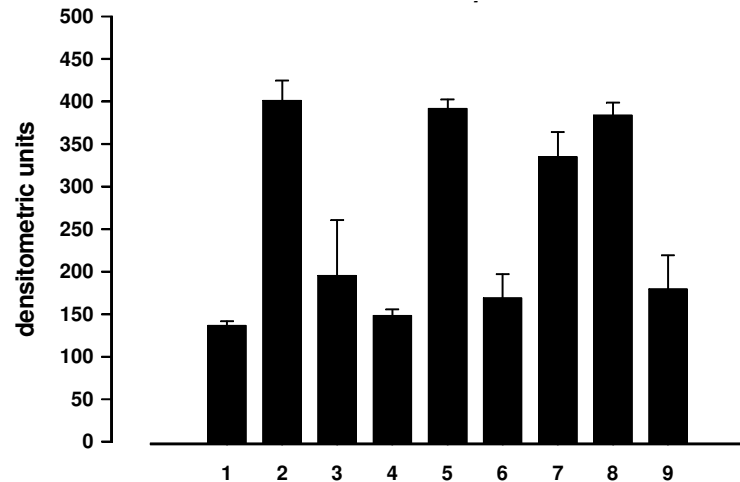

**B**

Supplement: MOESM2 [file 9547864]
